# Supplementary material for: The effect of deposition mechanism on the properties of epitaxial PbS films grown from acidic bath
Source: Royal Society of Chemistry journal article supplement (doi:10.1039/d0qm01107j), 2021-01-01
Supplement: d0qm01107j1.pdf [file d0qm01107j1.pdf]

## The Effect of Deposition Mechanism on the Properties of Epitaxial PbS Films Grown from Acidic Bath

Maayan Perez<sup>a,b</sup>, Michael Shandalov<sup>c</sup>, Yuval Golan<sup>a,b\*</sup>, Tzvi Templeman<sup>a,b</sup>, Vladimir Ezersky<sup>b</sup>, and Eyal Yahel<sup>c</sup>

### Supplementary Information

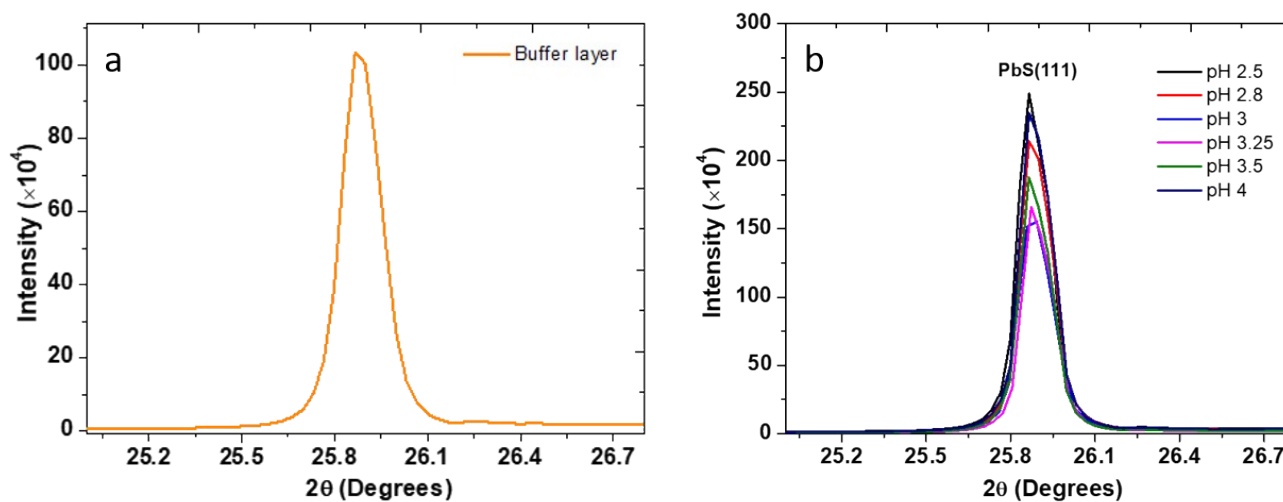

Figure S1. XRD results of (a) PbS buffer layer grown from alkaline bath at 25°C for 5min. (b) PbS films grown at different pH (2.5-4), at 90°C for 90 min.

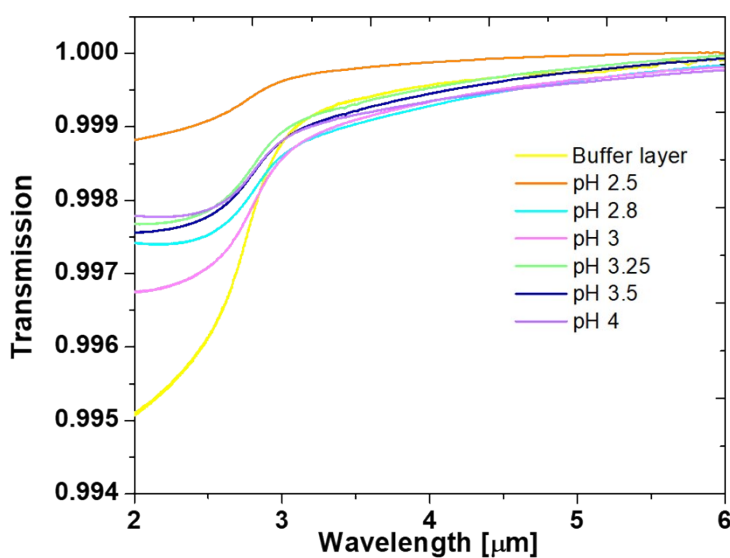

Figure S2. Transmission measurements performed on PbS films grown at various pH.
